# Supplementary material for: A Fully Programmable DAQ Board of Vibrational Signals from IEPE Sensors: Hardware and Software Design, Performance Analysis
Source: MDPI journal article supplement (doi:10.3390/electronics13071187), 2024-03-24
Supplement: s1 [file s1]

| Item # | *Ref Des                                                                                                                                                                                                           | *Qty | *Manufacturer                 | *Mfg Part #       | LCSC Part number               | Description / Value                                                                                              | *Package                    | Type         | Your Instructions / Notes                                                                                                                                                                                                                                                                 | Price/Unit [USD] |         |
|--------|--------------------------------------------------------------------------------------------------------------------------------------------------------------------------------------------------------------------|------|-------------------------------|-------------------|--------------------------------|------------------------------------------------------------------------------------------------------------------|-----------------------------|--------------|-------------------------------------------------------------------------------------------------------------------------------------------------------------------------------------------------------------------------------------------------------------------------------------------|------------------|---------|
| 1      | U1, U4, U5, U6, U9, U11, U12, U13                                                                                                                                                                                  | 8    | Texas Instruments             | OPA27GP           | C1346270                       | POIP-8 Precision OpAmps ROHS                                                                                     | PDP-8                       | Through-hole |                                                                                                                                                                                                                                                                                           | 5.7575           | 46.06   |
| 2      | U8, U10                                                                                                                                                                                                            | 2    | Analog Devices                | LT1037ACN#PBF     | C661998                        | POIP-8 Low Noise Amplifiers (LNA) - RF ROHS                                                                      | PDP-8                       | Through-hole |                                                                                                                                                                                                                                                                                           | 4.8625           | 9.765   |
| 3      | U8, U15                                                                                                                                                                                                            | 2    | Analog Devices                | LT3092EST#TRPBF   | C580042                        | SOT-223 Battery Management ICs ROHS                                                                              | SOT-223                     | SMD          |                                                                                                                                                                                                                                                                                           | 17.7466          | 35.4932 |
| 4      | U2                                                                                                                                                                                                                 | 1    | Texas Instruments             | LM2940T-12.0/NOPB | C2872373                       | TO-220-3 Linear Voltage Regulators (LDO) ROHS                                                                    | TO-220-3                    | Through-hole |                                                                                                                                                                                                                                                                                           | 1.2075           | 1.2075  |
| 5      | U16                                                                                                                                                                                                                | 1    | RENESAS                       | ICL7660AIBA2A-T   | C7881                          | SOIC-8 150mV DC-DC Converters ROHS                                                                               | SOIC-8 150mil               | SMD          |                                                                                                                                                                                                                                                                                           | 0.8655           | 0.8655  |
| 6      | U17                                                                                                                                                                                                                | 1    | ROHM Semiconductor            | BD03FA1FP3-ZTL    | C525661                        | SOT89-3K Linear Voltage Regulators (LDO) ROHS                                                                    | SOT89-3K                    | SMD          |                                                                                                                                                                                                                                                                                           | 0.49             | 0.49    |
| 7      | U19                                                                                                                                                                                                                | 1    | ROHM Semiconductor            | BD05FA1FP3-ZTL    | not available in LCSC database | SOT89-3K Linear Voltage Regulators (LDO) ROHS                                                                    | SMD                         |              | DigiKey link: <a href="https://www.digikey.it/products/detail/rohm-semiconductor/BD05FA1FP3-ZTL/78954407a?n=4qTCBcDaIEBCaGAYgQChaoAGYBaALw8cAHEAXDF8g">https://www.digikey.it/products/detail/rohm-semiconductor/BD05FA1FP3-ZTL/78954407a?n=4qTCBcDaIEBCaGAYgQChaoAGYBaALw8cAHEAXDF8g</a> | 0.44             | 0.44    |
| 8      | U7, U14                                                                                                                                                                                                            | 2    | Analog Devices                | AD7367BRUJ-5      | C650859                        | TSSOP-24 Analog To Digital Converters (ADCs) ROHS                                                                | TSSOP-24                    | SMD          |                                                                                                                                                                                                                                                                                           | 9.7237           | 19.4474 |
| 9      | U18                                                                                                                                                                                                                | 1    | Qimex Ltd.                    | HC-08             | not available in LCSC database | Bluetooth Module - HQ 15.1 BLUETOOTH SERIAL -HC 08                                                               | 27 mm * 13 mm * 2mm (LxWxH) | SMD          | Mouser link: <a href="https://www.mouser.it/ProductDetail/QimexLtd/BLUETOOTH-SERIAL-HC-08?qs=IMCYG%252Bw4%252BzshQkQvDkAYw%3D%3D">https://www.mouser.it/ProductDetail/QimexLtd/BLUETOOTH-SERIAL-HC-08?qs=IMCYG%252Bw4%252BzshQkQvDkAYw%3D%3D</a>                                          | Unavailable      | 0       |
| 10     | U20                                                                                                                                                                                                                | 1    | FAIRCHILD SEMICONDUCTOR       | LM393N            | C3658599                       | PDP-8 Comparators ROHS                                                                                           | PDP-8                       | Through-hole |                                                                                                                                                                                                                                                                                           | 0.3415           | 0.3415  |
| 11     | MCU                                                                                                                                                                                                                | 2    | HCITL                         | PM254-1-20-Z-8.5  | C2897383                       | 2.54mm 3A-40°C→105°C Straight 1x20P 8.5mm Top 20 1 Square Holes Straight P=2.54mm Female Headers ROHS            | Straight P=2.54mm           | Through-hole | Place the two header rows accordingly to the footprint of "MCU" in the layout                                                                                                                                                                                                             | 0.2768           | 0.5536  |
| 12     | SD_CARD_READER                                                                                                                                                                                                     | 1    | BOOMELE(Boom Precision Elec)  | C37208            | C37208                         | 2.54mm Straight 1x6P 6 1 Straight P=2.54mm Female Headers ROHS                                                   | Straight P=2.54mm           | Through-hole | Place the header row accordingly to the footprint of "SD_CARD_READER" in the layout                                                                                                                                                                                                       | 0.0275           | 0.0275  |
| 13     | R44, R45, R43, R42                                                                                                                                                                                                 | 4    | YAGEO                         | PA1208F7W0R001L   | C914636                        | 500mW ±100ppm/°C ±1% 1mΩ 1206 Chip Resistor - Surface Mount ROHS                                                 | 1206                        | SMD          |                                                                                                                                                                                                                                                                                           | 0.1231           | 0.1231  |
| 14     | R29, R11                                                                                                                                                                                                           | 2    | Viking Tech                   | ARG06DTC2700      | C2628905                       | 250mW Thin Film Resistor 20V ±25ppm/°C ±0.1% -55°C→+155°C 270Ω 1206 Chip Resistor - Surface Mount ROHS           | 1206                        | SMD          |                                                                                                                                                                                                                                                                                           | 0.1231           | 0.2462  |
| 15     | R30, R12                                                                                                                                                                                                           | 2    | UNI-ROYAL(Uniroyal Elec)      | TQ0625B1203TSJ    | C2980117                       | 250mW ±0.1% 120kΩ 1206 Chip Resistor - Surface Mount ROHS                                                        | 1206                        | SMD          |                                                                                                                                                                                                                                                                                           | 0.0527           | 0.1044  |
| 16     | R21, R25, R3, R7, R36, R35, R40, R41, R30, R38                                                                                                                                                                     | 10   | Viking Tech                   | AR06BTCV1002      | C319646                        | 250mW Thin Film Resistor 150V ±25ppm/°C ±0.1% -55°C→+155°C 10kΩ 1206 Chip Resistor - Surface Mount ROHS          | 1206                        | SMD          |                                                                                                                                                                                                                                                                                           | 0.0678           | 0.678   |
| 17     | R20, R32                                                                                                                                                                                                           | 2    | KOA Speer Elec                | RS73F28TTD5604D   | C4207500                       | 333.333mW Thick Film Resistor ±0.5% ±25ppm/°C -55°C→+155°C 5.6MΩ 1206 Chip Resistor - Surface Mount ROHS         | 1206                        | SMD          |                                                                                                                                                                                                                                                                                           | 0.1149           | 0.2298  |
| 18     | R50, R46                                                                                                                                                                                                           | 2    | Vishay Intertech              | TNPW120639KBEEN   | C3941905                       | 250mW Thin Film Resistor ±25ppm/°C ±0.1% 200kΩ -55°C→+155°C 1206 Chip Resistor - Surface Mount ROHS              | 1206                        | SMD          |                                                                                                                                                                                                                                                                                           | 0.6941           | 1.3682  |
| 19     | R19, R15                                                                                                                                                                                                           | 2    | Resistor_Today                | PTRF1206B75K0P9   | C351455                        | 250mW Thin Film Resistor 200V ±25ppm/°C ±0.1% -55°C→+125°C 75kΩ 1206 Chip Resistor - Surface Mount ROHS          | 1206                        | SMD          |                                                                                                                                                                                                                                                                                           | 0.2264           | 0.4528  |
| 20     | R51, R47                                                                                                                                                                                                           | 2    | UNI-ROYAL(Uniroyal Elec)      | TQ0625B2403TSJ    | C2980468                       | 250mW ±0.1% 240kΩ 1206 Chip Resistor - Surface Mount ROHS                                                        | 1206                        | SMD          |                                                                                                                                                                                                                                                                                           | 0.0527           | 0.1054  |
| 21     | R17, R14                                                                                                                                                                                                           | 2    | Resistor_Today                | PTRF1206B75K0P9   | C351453                        | 250mW Thin Film Resistor 200V ±25ppm/°C ±0.1% -55°C→+125°C 75kΩ 1206 Chip Resistor - Surface Mount ROHS          | 1206                        | SMD          |                                                                                                                                                                                                                                                                                           | 0.2232           | 0.4464  |
| 22     | R52, R48                                                                                                                                                                                                           | 2    | Viking Tech                   | AR06BTCV1502      | C319850                        | 125mW Thin Film Resistor 150V ±25ppm/°C ±0.1% -55°C→+155°C 15kΩ 1206 Chip Resistor - Surface Mount ROHS          | 1206                        | SMD          |                                                                                                                                                                                                                                                                                           | 0.0609           | 0.1218  |
| 23     | R18, R14                                                                                                                                                                                                           | 2    | PANASONIC                     | EBA-8APB303V      | C3955872                       | 250mW Thin Film Resistor ±0.1% ±15ppm/°C -55°C→+125°C 30kΩ 1206 Chip Resistor - Surface Mount ROHS               | 1206                        | SMD          |                                                                                                                                                                                                                                                                                           | 0.4114           | 0.823   |
| 24     | R53, R49                                                                                                                                                                                                           | 2    | YAGEO                         | RT1206BR0071K1    | C706465                        | 250mW Thin Film Resistor 200V ±25ppm/°C ±0.1% -55°C→+155°C 1kΩ 1206 Chip Resistor - Surface Mount ROHS           | 1206                        | SMD          |                                                                                                                                                                                                                                                                                           | 0.0501           | 0.1002  |
| 25     | R28, R10                                                                                                                                                                                                           | 2    | Viking Tech                   | AR06BTCV1202      | C319696                        | 125mW Thin Film Resistor 150V ±25ppm/°C ±0.1% -55°C→+155°C 12kΩ 1206 Chip Resistor - Surface Mount ROHS          | 1206                        | SMD          |                                                                                                                                                                                                                                                                                           | 0.0591           | 0.1162  |
| 26     | R27, R9                                                                                                                                                                                                            | 2    | Resistor_Today                | PTRF1206B75K0P9   | C351451                        | 250mW Thin Film Resistor 200V ±25ppm/°C ±0.1% -55°C→+125°C 7.5kΩ 1206 Chip Resistor - Surface Mount ROHS         | 1206                        | SMD          |                                                                                                                                                                                                                                                                                           | 0.2143           | 0.4286  |
| 27     | R54                                                                                                                                                                                                                | 1    | KOA Speer Elec                | RN73R28TTD8200R05 | C4111797                       | 250mW Thin Film Resistor ±0.1% ±5ppm/°C -55°C→+155°C 820Ω 1206 Chip Resistor - Surface Mount ROHS                | 1206                        | SMD          |                                                                                                                                                                                                                                                                                           | 0.5769           | 0.576   |
| 28     | R55                                                                                                                                                                                                                | 1    | Resistor_Today                | PTRF1206B1K50P9   | C351482                        | 250mW Thin Film Resistor 200V ±25ppm/°C ±0.1% -55°C→+125°C 1.5kΩ 1206 Chip Resistor - Surface Mount ROHS         | 1206                        | SMD          |                                                                                                                                                                                                                                                                                           | 0.2293           | 0.2293  |
| 29     | R26, R8                                                                                                                                                                                                            | 2    | PANASONIC                     | EBA-8ARB432V      | C4050013                       | 250mW Thin Film Resistor ±0.1% ±10ppm/°C -55°C→+125°C 4.3kΩ 1206 Chip Resistor - Surface Mount ROHS              | 1206                        | SMD          |                                                                                                                                                                                                                                                                                           | 0.0896           | 0.0896  |
| 30     | R16, R31, R22, R23, R24, R33, R1, R13, R4, R5, R6, R34                                                                                                                                                             | 12   | BOCHEN(Chengdu Guosheng Tech) | 3362P-1-103       | C118956                        | THERMISTOR 10K OHM 0.5W PC PIN TGP                                                                               | Plugin                      | Through-hole |                                                                                                                                                                                                                                                                                           | 0.1116           | 1.3392  |
| 31     | C44, C45, C2, C8, C9, C53, C11, C10, C15, C13, C24, C25, C31, C30, C56, C27, C26, C32, C29, C54, C55                                                                                                               | 21   | Samsung Electro-Mechanics     | CL 10A226MO7J2NC  | C2762594                       | 16V 22uF ±20% 0603 Multilayer Ceramic Capacitors MLCC - SMD/SMT ROHS                                             | 0603                        | SMD          |                                                                                                                                                                                                                                                                                           | 0.0724           | 1.5204  |
| 32     | C47, C46, C5, C48                                                                                                                                                                                                  | 4    | YAGEO                         | CC1206KK7878B105  | C527272                        | 16V 1uF X7R ±5% 1206 Multilayer Ceramic Capacitors MLCC - SMD/SMT ROHS                                           | 1206                        | SMD          |                                                                                                                                                                                                                                                                                           | 0.0619           | 0.2476  |
| 33     | C7, C4                                                                                                                                                                                                             | 2    | Knowles                       | 1206J0250101FFR   | C2423653                       | 25V 100pF ±1% 1206 Multilayer Ceramic Capacitors MLCC - SMD/SMT ROHS                                             | 1206                        | SMD          |                                                                                                                                                                                                                                                                                           | 0.848            | 1.696   |
| 34     | C6, C3                                                                                                                                                                                                             | 2    | Vishay Intertech              | VJ1206A470FXCAR   | C2311527                       | 200V 47pF C0G ±1% 1206 Multilayer Ceramic Capacitors MLCC - SMD/SMT ROHS                                         | 1206                        | SMD          |                                                                                                                                                                                                                                                                                           | 0.2326           | 0.4652  |
| 35     | C1                                                                                                                                                                                                                 | 1    | YAGEO                         | CC0603FRNP09BNH71 | C519564                        | 50V 470pF NP0 ±1% 0603 Multilayer Ceramic Capacitors MLCC - SMD/SMT ROHS                                         | 0603                        | SMD          |                                                                                                                                                                                                                                                                                           | 0.0129           | 0.0129  |
| 36     | C14, C16, C21, C18, C19, C20, C40, C37, C38, C39                                                                                                                                                                   | 10   | KEMET                         | T491B106M016AT    | C118754                        | 10uF 16V -55°C→+125°C 20% 100kHz ±20% CASE-B 3528 Tantalum Capacitors ROHS                                       | CASE-B 3528                 | SMD          |                                                                                                                                                                                                                                                                                           | 0.1259           | 1.259   |
| 37     | C51, C50, C42, C43, C49, C36, C35, C23, C33, C34                                                                                                                                                                   | 10   | KEMET                         | T491A104K050AT    | C2798032                       | 100uF 50V 200 -55°C→+125°C ±10% CASE-A 3216 Tantalum Capacitors ROHS                                             | CASE-A 3216                 | SMD          |                                                                                                                                                                                                                                                                                           | 0.2323           | 2.323   |
| 38     | C17, C22, C41, C52                                                                                                                                                                                                 | 4    | KEMET                         | T491A684K025AT    | C805502                        | 680uF 25V -55°C→+125°C 100kHz ±10% CASE-A 3216 Tantalum Capacitors ROHS                                          | CASE-A 3216                 | SMD          |                                                                                                                                                                                                                                                                                           | 0.1477           | 0.5908  |
| 39     | D11, D10, D4, D3                                                                                                                                                                                                   | 4    | ROHM Semiconductor            | CD2FHT2BA12B      | not available in LCSC database | Zener Diodes 11.7V-12.24V 100mW SOD-923 5mA                                                                      | SOD-923-3                   | SMD          | Mouser link: <a href="https://www.mouser.it/ProductDetail/ROHM-Semiconductor/CD2FHT2BA12B?qs=4v%252BZTmkVHFr%252B%252BwPRAS%3D%3D">https://www.mouser.it/ProductDetail/ROHM-Semiconductor/CD2FHT2BA12B?qs=4v%252BZTmkVHFr%252B%252BwPRAS%3D%3D</a>                                        | 0.36             | 1.52    |
| 40     | D2, D1                                                                                                                                                                                                             | 2    | ROHM Semiconductor            | CD2FHT2RA27B      | not available in LCSC database | Zener Diodes 26, 19-27.53V 100mW SOD-923 2mA                                                                     | SOD-923-2                   | SMD          | Mouser link: <a href="https://www.mouser.it/ProductDetail/ROHM-Semiconductor/CD2FHT2RA27B?qs=4v%252BZTmkVHFr%252B%252BwPRAS%3D%3D">https://www.mouser.it/ProductDetail/ROHM-Semiconductor/CD2FHT2RA27B?qs=4v%252BZTmkVHFr%252B%252BwPRAS%3D%3D</a>                                        | 0.36             | 0.76    |
| 41     | D6, D4                                                                                                                                                                                                             | 2    | onsemi                        | SZVZ95V0T5Q       | not available in LCSC database | Zener Diodes SOD-923 RUT 50V LPS PBF                                                                             | SOD-923-2                   | SMD          | Mouser link: <a href="https://www.mouser.it/ProductDetail/onsemi/SZVZ95V0T5Q?qs=4v%252BZTmkVHFr%252B%252BwPRAS%3D%3D">https://www.mouser.it/ProductDetail/onsemi/SZVZ95V0T5Q?qs=4v%252BZTmkVHFr%252B%252BwPRAS%3D%3D</a>                                                                  | 0.53             | 1.06    |
| 42     | D12                                                                                                                                                                                                                | 1    | onsemi                        | 1N914             | C125665                        | 75V -55°C→+175°C(TJ) 500mW 1V@10mA 4mA 5uA@75V 75mA DO-35 Switching Diode ROHS                                   | DO-35                       | Through-hole |                                                                                                                                                                                                                                                                                           | 0.0116           | 0.0116  |
| 43     | D9, D7                                                                                                                                                                                                             | 2    | Yongyu Photoelectric          | SZY11206R         | C434438                        | 20mA 645nm Colorless transparency -40°C→+85°C 615nm-630nm Red 120° 40mW 1206 Light Emitting Diodes (LED) ROHS    | LED-1206                    | SMD          |                                                                                                                                                                                                                                                                                           | 0.0113           | 0.0226  |
| 44     | D8                                                                                                                                                                                                                 | 1    | Yongyu Photoelectric          | SZY11206B         | C434440                        | 5mA 645nm Colorless transparency -40°C→+85°C 600nm-475nm blue 120° 100mW 1206 Light Emitting Diodes (LED) ROHS   | LED-1206                    | SMD          |                                                                                                                                                                                                                                                                                           | 0.0154           | 0.0154  |
| 45     | GAIN_VGA1_600, GAIN_VGA1_100, GAIN_VGA1_10, GAIN_VGA1_5, GAIN_VGA1_1, GAIN_VGA2_600, GAIN_VGA2_100, GAIN_VGA2_10, GAIN_VGA2_5, GAIN_VGA2_1, J15, J16, J2, J3, J20, J19, J6, J7, J17, J18, J21, J22, TRIGGER SIGNAL | 23   | ZHOURI                        | 2.54-1*2          | C5116481                       | Straight P=2.54mm Pin Headers ROHS                                                                               | Straight P=2.54mm           | Through-hole |                                                                                                                                                                                                                                                                                           | 0                | 0.4715  |
| 46     | +15V_POWER_SUPPLY, +20V_POWER_SUPPLY                                                                                                                                                                               | 2    | JST Sales America             | B2B-XHA(LF)(SN)   | C158012                        | 1x2P XH 1.25mm 2 Rows Straight P=2.5mm Wire To Board / Wire To Wire Connector ROHS                               | Straight P=2.5mm            | Through-hole |                                                                                                                                                                                                                                                                                           | 0.0346           | 0.0692  |
| 47     | CONN_1_1, CONN_1_2, CONN_2_1, CONN_2_2                                                                                                                                                                             | 4    | doshconn                      | DOBIN-801-0031    | C521205                        | BNC Board Edge Bend 3GHz -55°C→+135°C 750 Plugin RF Connectors / Coaxial Connectors ROHS                         | Plugin                      | Through-hole |                                                                                                                                                                                                                                                                                           | 1.1710           | 4.684   |
| 48     | START_STOP_MENU_UP_DOWN                                                                                                                                                                                            | 5    | HOOYA                         | PB-22E66-S-E      | C2939295                       | 6mm*6mm Push Switches ROHS                                                                                       | 6mm*6mm                     | Through-hole |                                                                                                                                                                                                                                                                                           | 0.1910           | 0.955   |
| 49     | SERIAL_CONNECTOR                                                                                                                                                                                                   | 1    | XFCN                          | PZ254V-11-04P     | C2691448                       | 250V 3A Straight Square Pins 2.5mm 6mm -40°C→+105°C 1.4 3mm 2.54mm Black 1x4P Straight P=2.54mm Pin Headers ROHS | Straight P=2.54mm           | Through-hole |                                                                                                                                                                                                                                                                                           | 0.0185           | 0.0185  |
